# Supplementary material for: Development and application of a multi-scale modelling framework for urban high-resolution NO 2 pollution mapping
Source: Copernicus journal article supplement (doi:10.5194/acp-2022-371), 2022-06-15
Supplement: Supplementary file 1 [file acp-2022-371-supplement.pdf]

*Supplement of*

**Development and application of a multi-scale modelling  
framework for urban high-resolution NO<sub>2</sub> pollution mapping**

Zhaofeng Lv<sup>\*</sup>, Zhenyu Luo<sup>\*</sup>, Fanyuan Deng, Xiaotong Wang, Junchao Zhao, Lucheng Xu, Tingkun He, Huan Liu<sup>\*</sup>, Kebin He

State Key Joint Laboratory of ESPC, School of Environment, Tsinghua University, Beijing 100084, China

<sup>\*</sup>Z. Lv. and Z. Luo. contributed equally to this work.

Corresponding Author:

\*Phone and fax: 86-10-62771679; e-mail: [liu\\_env@tsinghua.edu.cn](mailto:liu_env@tsinghua.edu.cn).

## Supplementary Figures

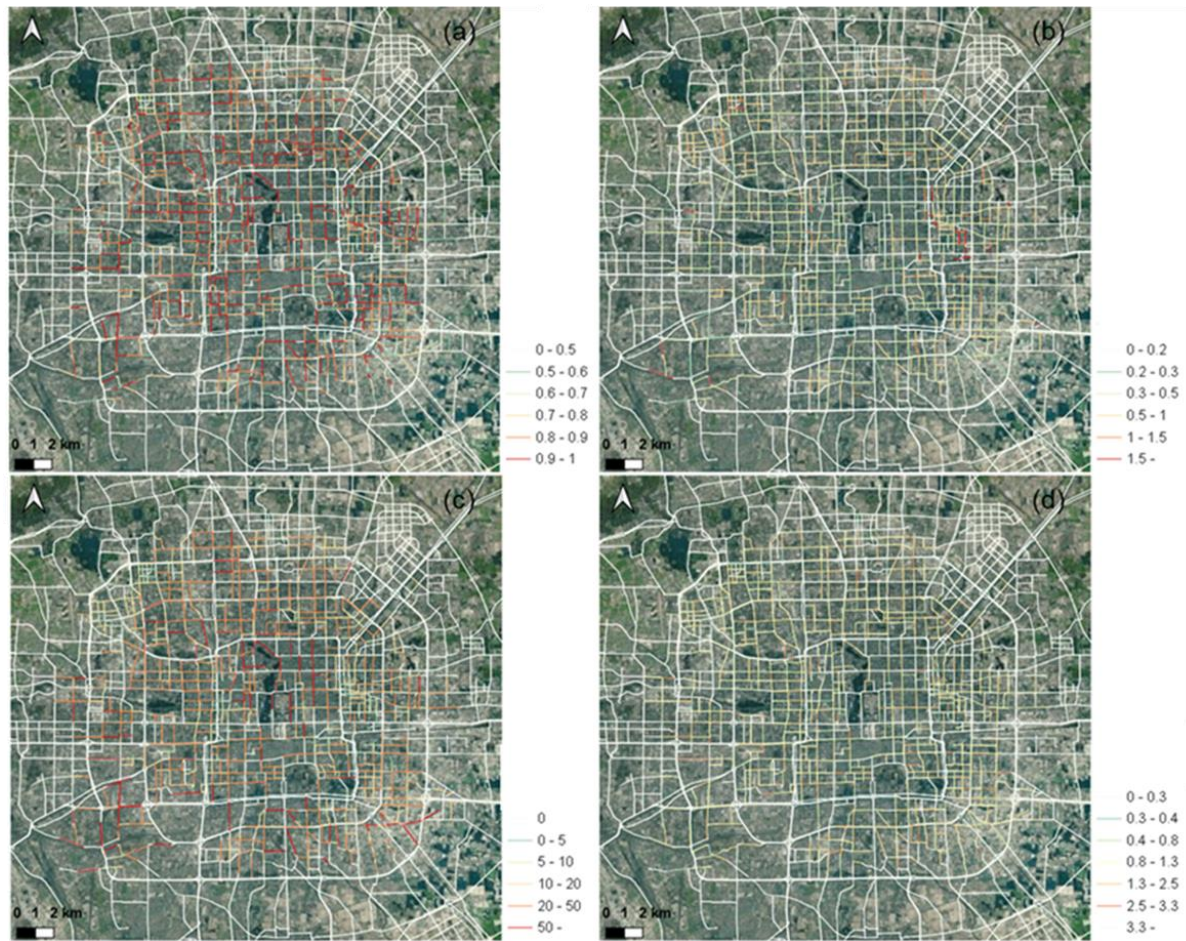

**Figure S1.** Spatial distribution of street canyon geometry in Beijing (© Microsoft). (a) Length of actual street canyon to the total street length, (b) Height to width ratio, (c) Length to height ratio and (d) Height symmetrical ratio.

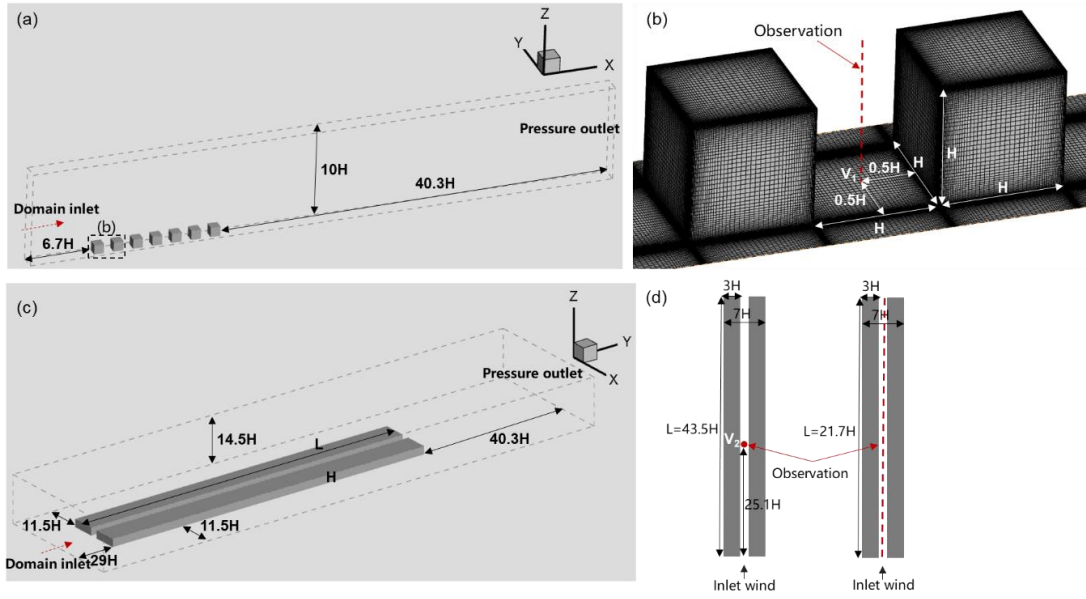

**Figure S2.** Computational domain and grid arrangement in CFD validation cases with the background wind being perpendicular (a-b) or parallel (c-d) to the axis of street canyons. In the first validation case (a-b), the vertical profiles of time-averaged velocity components (stream-wise velocity  $U$  and vertical velocity  $W$ ) are measured at point  $V_1$ . In another validation case (c-d), the vertical (point  $V_2$ ) and horizontal ( $z=0.11H$ ) profiles of time-averaged stream-wise velocity  $U$  are measured.

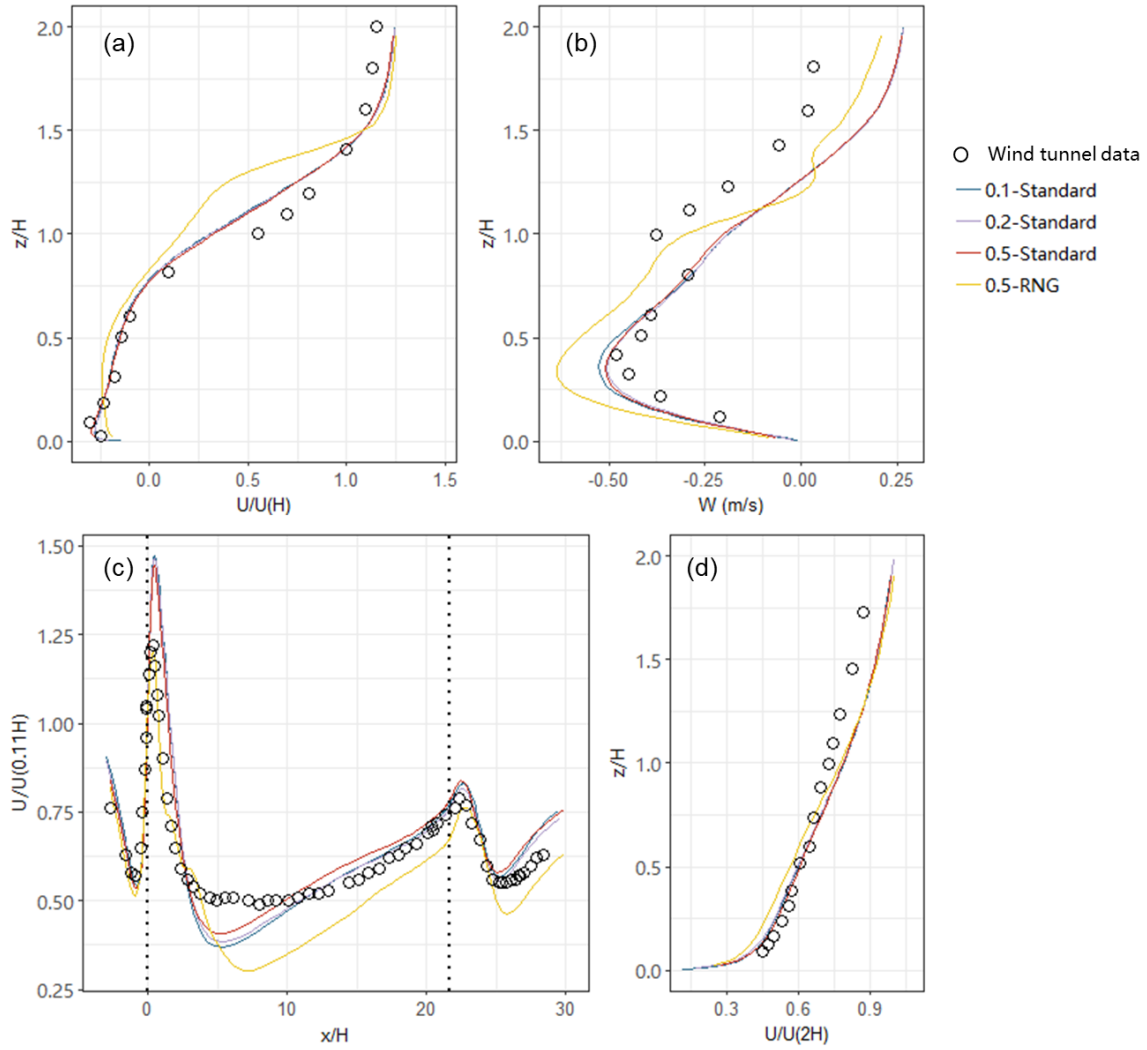

**Figure S3.** Model performances of CFD validation cases in street canyons perpendicular (a-b) or parallel (c-d) to the wind direction at the roof level. (a) Vertical profiles of  $U$  at point  $V_1$ ; (b) Vertical profiles of  $W$  at point  $V_1$ ; (c) Horizontal profiles of  $U$  at  $z=0.11H$ ; (d) Vertical profiles of  $U$  at point  $V_2$ . In each validation case, three grid arrangement are tested, where the minimum sizes of hexahedral cells near wall surfaces are 0.1 m (fine grid), 0.2 m (medium grid) and 0.5 m (coarse grid) respectively. Moreover, the standard and RNG  $k-\epsilon$  turbulence models are tested respectively.

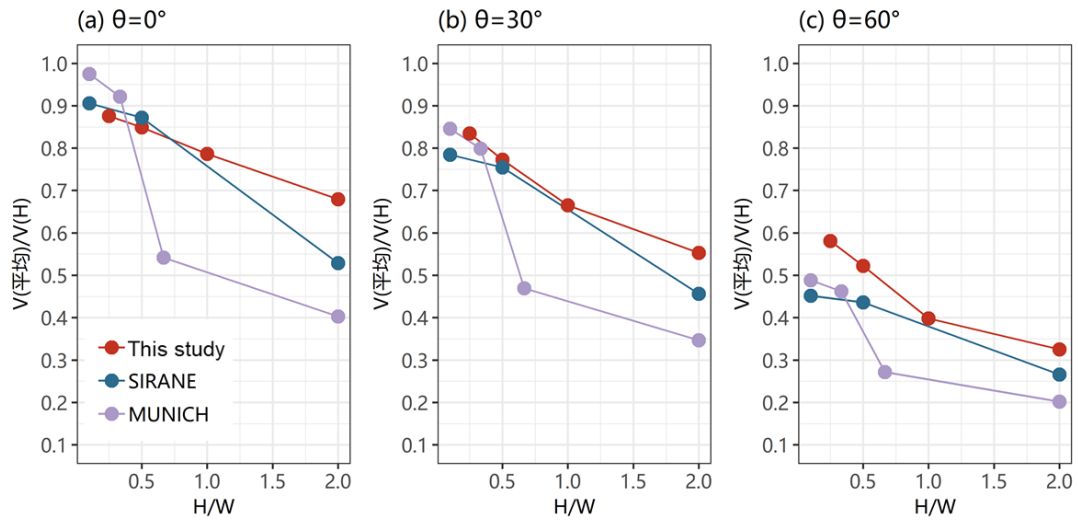

**Figure S4.** Comparison between the predicted wind speed in street canyons with different background wind direction and aspect ratio and other research results.

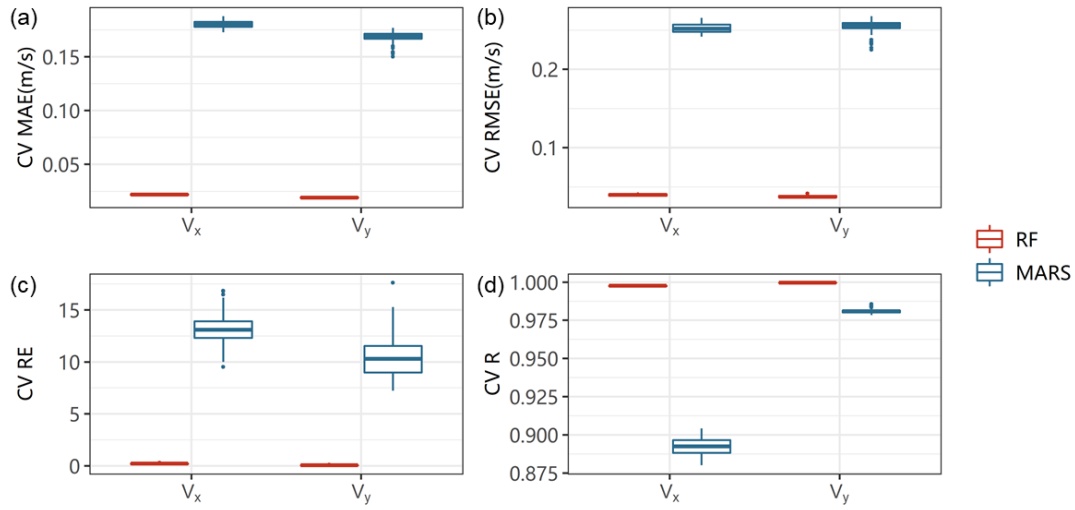

**Figure S5.** Model performance statistics of machine learning for  $V_x$  and  $V_y$  in street canyon. (a) MAE; (b) RMSE; (c) RE; (d) R.

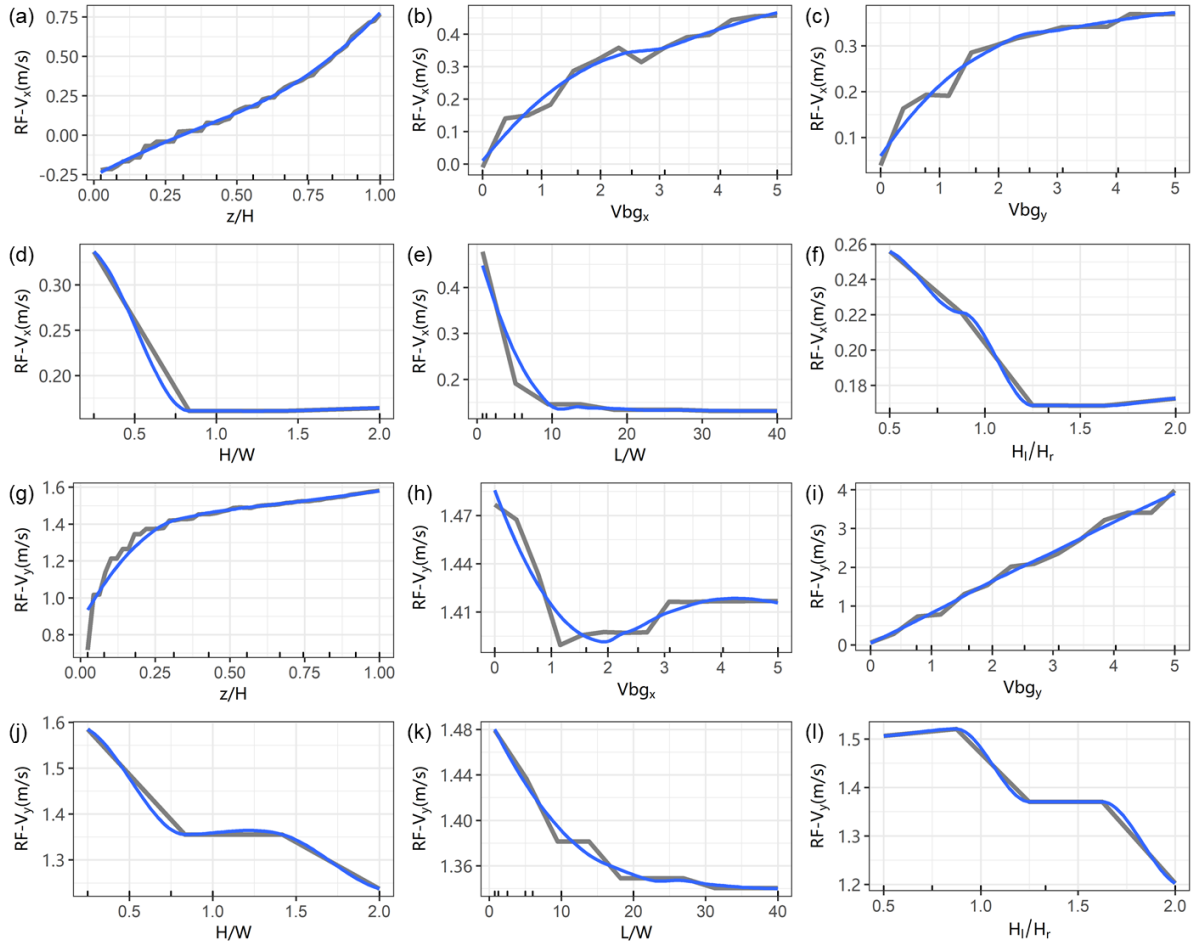

**Figure S6.** The partial dependence plots of each predictor variable in RF model for  $V_x$  (a-f) and  $V_y$  (g-l). The blue line stands for the smooth fitting curves. The labels above the x-axis shows deciles, minimum and maximum of the predictor variable.

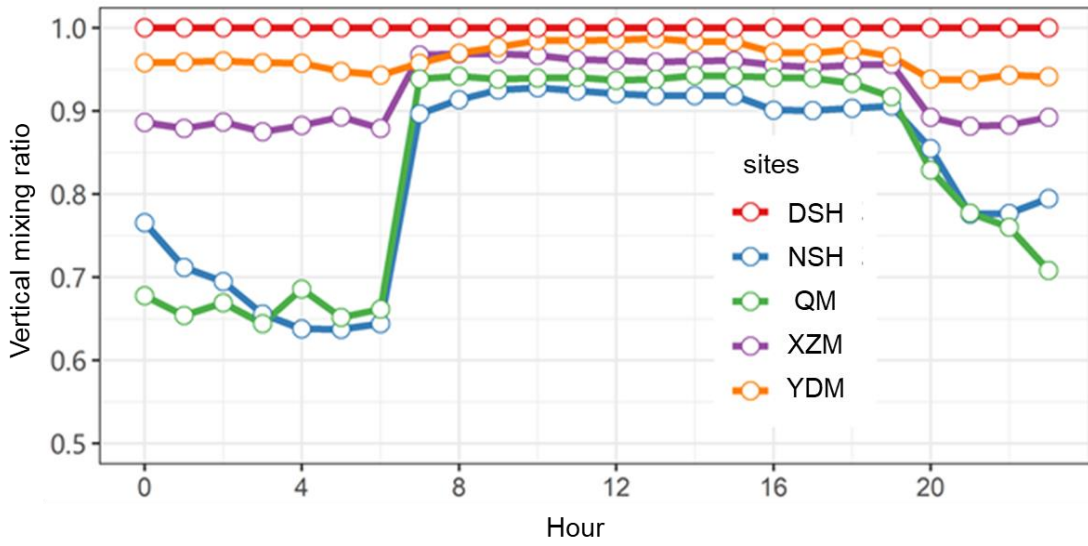

**Figure S7.** Diurnal variation of background concentration mixing ratio at roadside monitoring sites in Beijing in summer 2019. The vertical mixing ratio=concentrations near surface/at the top of UCL



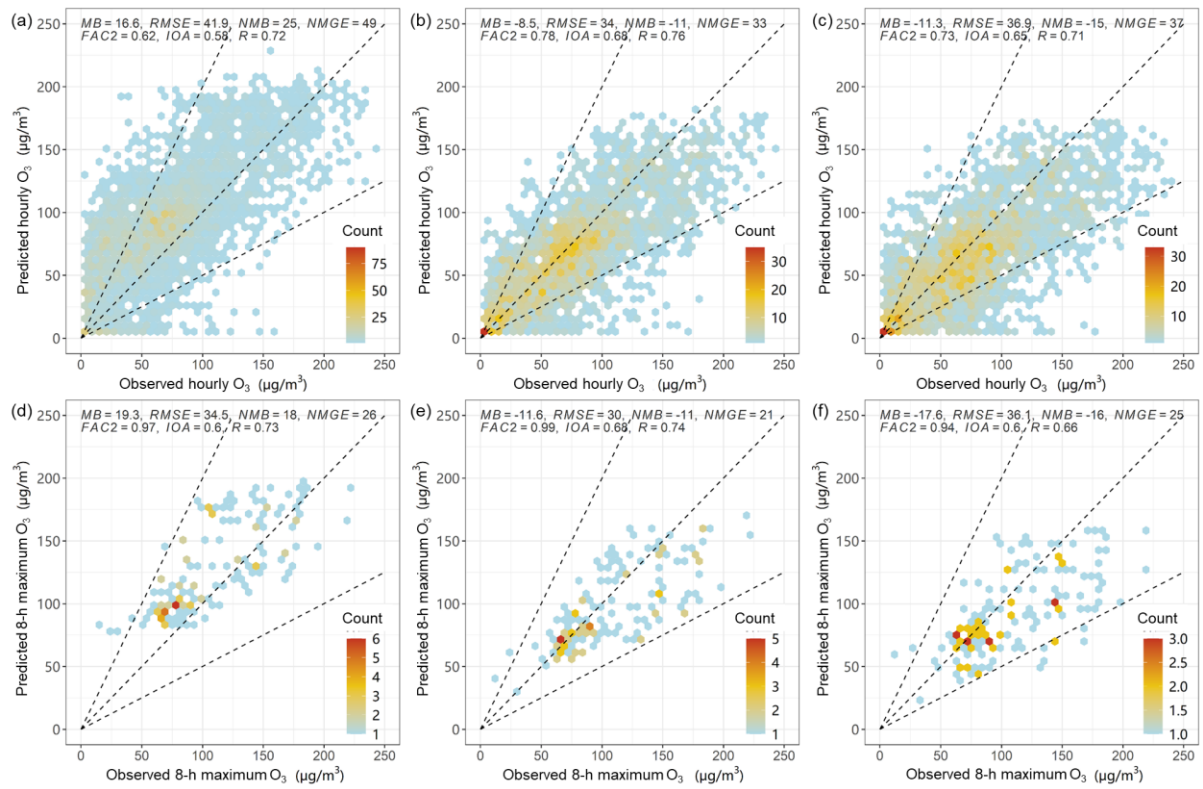

**Figure S8.** Observed and predicted hourly (a-c) or 8-h maximum averaged (d-f)  $O_3$  concentrations from different models at near-road sites: (a, d) CMAQ model; (b, e) CMAQ-RLINE model; (c, f) CMAQ-RLINE\_URBAN model.

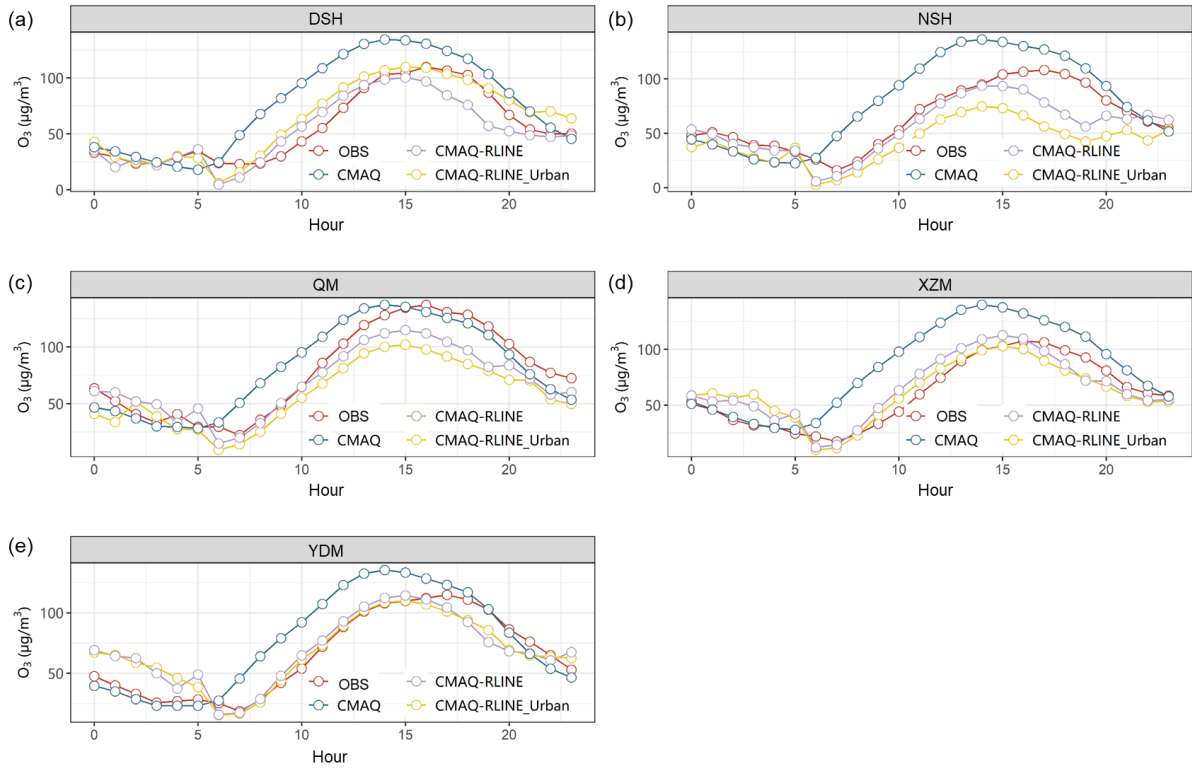

**Figure S9.** Diurnal variations of observed and predicted hourly averaged O<sub>3</sub> concentrations from different models at near-road monitoring sites: (a) DSH; (b) NSH; (c) QM; (d) XZM; (e) YDM.

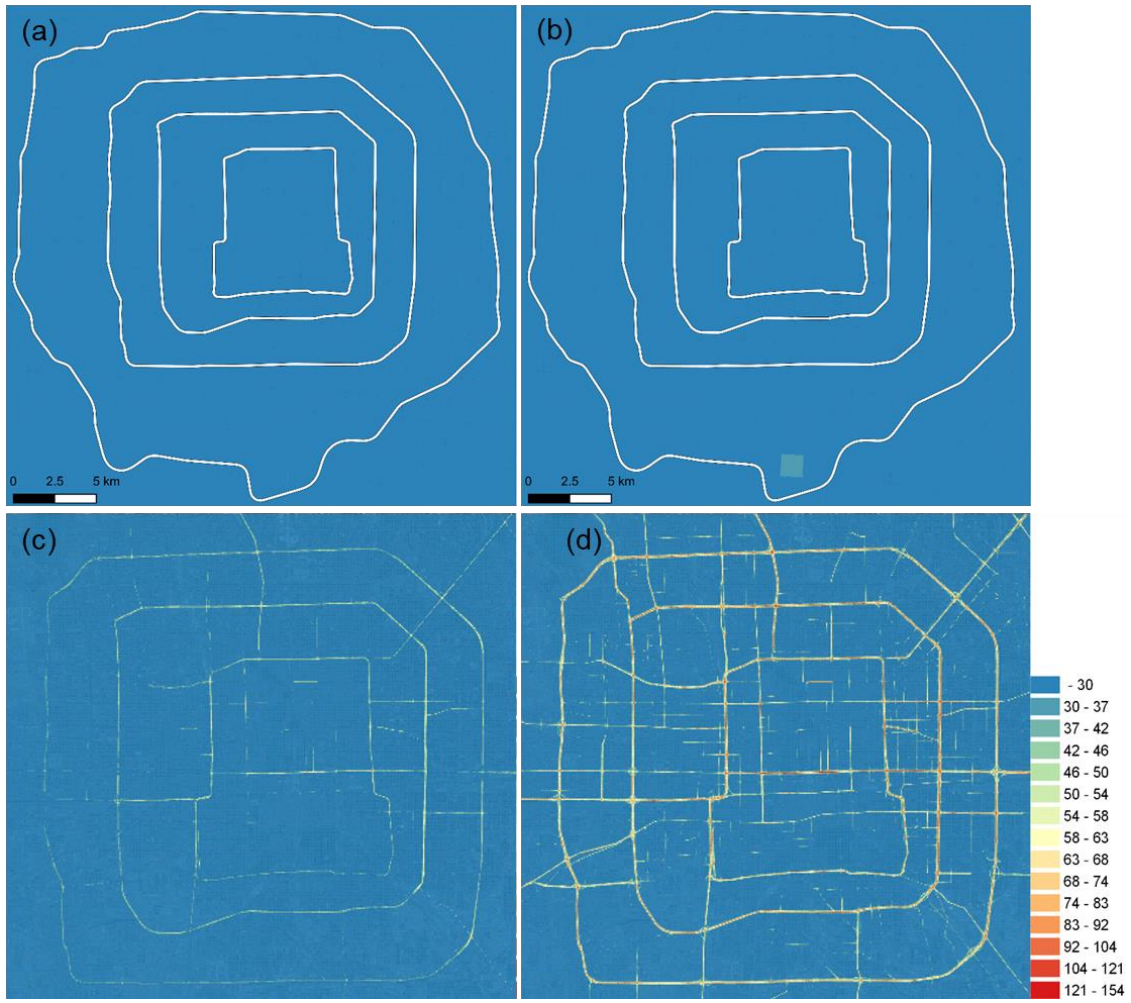

**Figure S10.** Spatial distribution of hourly averaged  $\text{NO}_2$  concentrations from (a, b) CMAQ model and (c, d) CMAQ-RLINE\_URBAN model at (a, c) 12:00-13:00 and (b, d) 18:00-19:00.

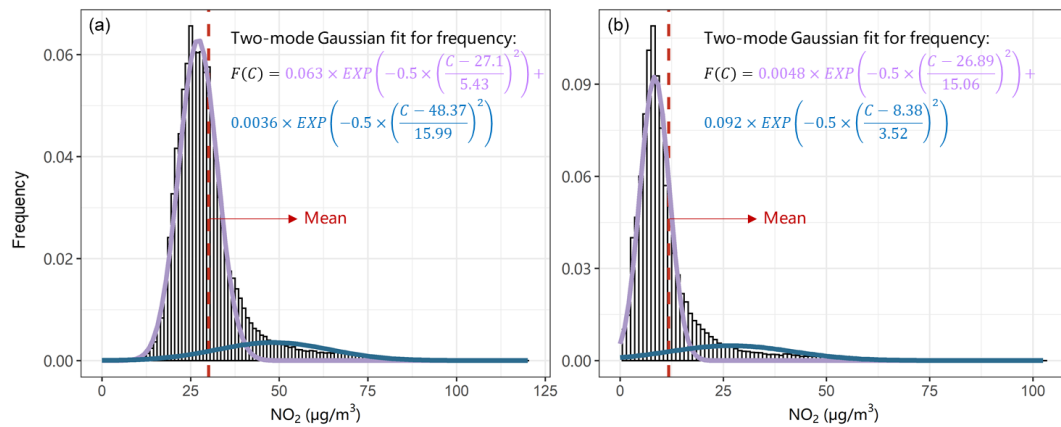

**Figure S11.** Frequency distribution of predicted monthly averaged NO<sub>2</sub> concentrations from (a) all source and (b) only vehicles. Two-mode Gaussian models, which are shown by purple and blue curves, are used to fit for the distribution.

## Supplementary Tables

**Table S1. Model performance statistics for the velocity components in CFD validation cases.**

| Species                                                       | Mean Observation<br>(m/s) | Mean Simulation<br>(m/s) | FAC2 | MFB<br>(%) | NMSE<br>(%) | R    |
|---------------------------------------------------------------|---------------------------|--------------------------|------|------------|-------------|------|
| <b>Validation case with the perpendicular background wind</b> |                           |                          |      |            |             |      |
| <i>u</i>                                                      | -0.48                     | -0.50                    | 1.00 | -5         | 2           | 0.98 |
| <i>w</i>                                                      | -0.37                     | -0.39                    | 1.00 | -4         | 5           | 0.58 |
| <b>Validation case with the parallel background wind</b>      |                           |                          |      |            |             |      |
| u(L=21.7H)                                                    | 0.68                      | 0.73                     | 1.00 | -7         | 3           | 0.97 |
| u(L=43.5H)                                                    | 0.58                      | 0.59                     | 1.00 | -1         | 0           | 0.99 |

Note: The coarse grid arrangement and standard k- $\epsilon$  turbulence model are used.

\*MFB: Mean fractional

**Table S2. Geometric characters for each monitoring site**

| Stations | $H/W$ | bd   | bh (m) | bhsd (m) | $z_0$ (m) |
|----------|-------|------|--------|----------|-----------|
| DSH      | 0     | 0.01 | 4.97   | 1.68     | 1         |
| NSH      | 0     | 0.13 | 19.61  | 31.96    | 1.06      |
| QM       | 0.22  | 0.2  | 9.98   | 3.56     | 1.37      |
| XZM      | 0.35  | 0.18 | 14.11  | 16.22    | 2.11      |
| YDM      | 0     | 0.22 | 10.13  | 4.55     | 1.02      |

\* $H/W$ , bd, bh, bhsd, and  $z_0$  represent street canyon aspect ratio, average building height (m), height standard deviation (m) and plane density, respectively (Benavides et al., 2019).

**Table S3. Model performances under different scenarios for each station**

| Sites | Scenario         | MB    | RMSE | NMB | NMGE | FAC2 | IOA   | R    |
|-------|------------------|-------|------|-----|------|------|-------|------|
| DSH   | CMAQ             | -15.6 | 33.4 | -28 | 48   | 0.53 | 0.45  | 0.52 |
|       | CMAQ-RLINE       | 28.2  | 63.1 | 51  | 69   | 0.73 | 0.20  | 0.50 |
|       | CMAQ-RLINE_URBAN | -6.2  | 28.5 | -11 | 36   | 0.84 | 0.58  | 0.60 |
| NSH   | CMAQ             | -20.5 | 37.9 | -33 | 50   | 0.53 | 0.12  | 0.30 |
|       | CMAQ-RLINE       | 30.2  | 65.1 | 49  | 65   | 0.76 | -0.12 | 0.33 |
|       | CMAQ-RLINE_URBAN | 17.2  | 39.8 | 28  | 48   | 0.81 | 0.15  | 0.28 |
| QM    | CMAQ             | -6.0  | 23.9 | -14 | 42   | 0.64 | 0.45  | 0.59 |
|       | CMAQ-RLINE       | 20.4  | 55.2 | 47  | 68   | 0.8  | 0.11  | 0.47 |
|       | CMAQ-RLINE_URBAN | 3.5   | 23.7 | 8   | 38   | 0.86 | 0.50  | 0.47 |
| XZM   | CMAQ             | -8.5  | 25.3 | -18 | 44   | 0.61 | 0.36  | 0.54 |
|       | CMAQ-RLINE       | 26.0  | 59.7 | 56  | 72   | 0.76 | -0.06 | 0.41 |
|       | CMAQ-RLINE_URBAN | 11.3  | 28.0 | 24  | 44   | 0.86 | 0.36  | 0.42 |
| YDM   | CMAQ             | 0.6   | 25.5 | 1   | 44   | 0.66 | 0.43  | 0.58 |
|       | CMAQ-RLINE       | 23.0  | 56.2 | 53  | 73   | 0.72 | 0.05  | 0.45 |
|       | CMAQ-RLINE_URBAN | 5.4   | 25.0 | 12  | 39   | 0.86 | 0.50  | 0.50 |

\*MB: Mean bias; RSME: Root mean squared error; NMB: Normalized mean bias; NMGE: Normalized mean gross error; FAC2: Fraction of predictions within a factor of two; IOA: Index of agreement; R: correlation coefficient.

## Reference

Benavides, J., Snyder, M., Guevara, M., Soret, A., Pérez García-Pando, C., Amato, F., Querol, X., and Jorba, O.: CALIOPE-Urban v1.0: coupling R-LINE with a mesoscale air quality modelling system for urban air quality forecasts over Barcelona city (Spain), *Geosci. Model Dev.*, 12, 2811-2835, 10.5194/gmd-12-2811-2019, 2019.
